# Supplementary material for: Hydrocortisone/cyclodextrin complex electrospun nanofibers for a fast-dissolving oral drug delivery system
Source: Royal Society of Chemistry journal article supplement (doi:10.1039/c9md00390h), 2020-01-01
Supplement: c9md00390h1.pdf [file c9md00390h1.pdf]

## **SUPPORTING INFORMATION**

### **Hydrocortisone/Cyclodextrin Complex Electrospun Nanofibers for Fast-Dissolving Oral Drug Delivery System**

Asli Celebioglu\*<sup>a</sup> and Tamer Uyar\*<sup>a</sup>

<sup>a</sup>Department of Fiber Science & Apparel Design, College of Human Ecology, Cornell University, Ithaca, NY, 14853, USA

\* Corresponding Authors: AC: [ac2873@cornell.edu](mailto:ac2873@cornell.edu); TU: [tu46@cornell.edu](mailto:tu46@cornell.edu)

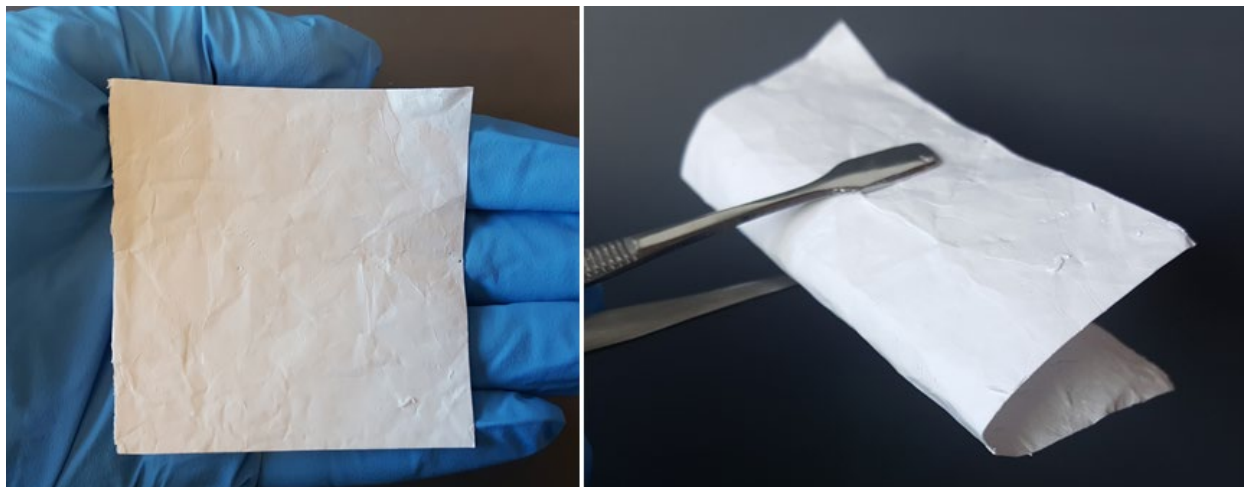

**Figure S1.** The photographs of the Hydrocortisone/HP- $\beta$ -CyD (1/2) nanofibrous webs after 3 months stored at 55-65% RH and 22 °C.

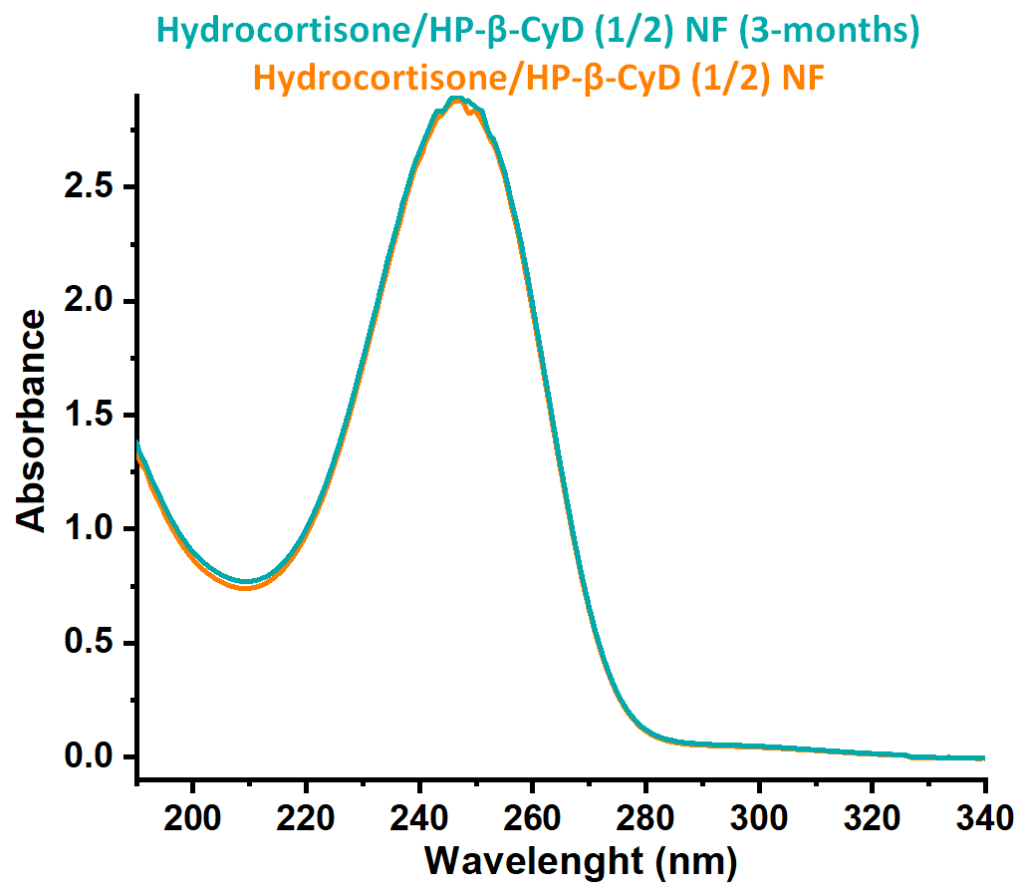

**Figure S2.** UV-Vis spectra of aqueous solutions of Hydrocortisone/HP-β-CyD (1/2) nanofibers before and after 3 months storage.
